# Supplementary material for: [Retracted] Predicting Course Grade through Comprehensive Modelling of Students’ Learning Behavioral Pattern
Source: Hindawi journal article supplement (doi:10.1155/2021/7463631), 2021-01-01
Supplement: f1 [file 7463631.f1.docx]

## Supplementary Materials

Table A1: Analysis of correlation between student models and course grades (teaching and reflection course)

| **Teaching and reflection** | | | | |
| --- | --- | --- | --- | --- |
|  | **content access (*m1*)** | **engagement (*m2*)** | **assessment (*m3*)** | **final grade** |
| **content access (*m1*)** | 1 | 0.327293 | 0.413713 | 0.274221 |
| **engagement (*m2*)** | 0.327293 | 1 | 0.226168 | 0.190241 |
| **assessment (*m3*)** | 0.413713 | 0.226168 | 1 | 0.365897 |
| **final grade** | 0.274221 | 0.190241 | 0.365897 | 1 |
| **count** | 98 | 98 | 98 | 98 |
| **mean** | 0.192454 | 0.208333 | 0.483493 | 0.683673 |
| **std** | 0.148879 | 0.185906 | 0.130544 | 1.099174 |
| **min** | 0.016272 | 0 | 0 | 0 |
| **max** | 0.815643 | 0.708333 | 0.751412 | 5 |

Table A2 : Performance measure of classification methods for course “teaching and reflection” with different feature numbers

| Features | Classification methods | Accuracy | Precision | f1 | Recall | Jaccard | fbeta |
| --- | --- | --- | --- | --- | --- | --- | --- |
|  | Nearest Neighbors | 0.6044 | 0.3403 | 0.3368 | 0.3765 | 0.2634 | 0.3300 |
|  | Linear SVM | 0.5822 | 0.2211 | 0.2675 | 0.3583 | 0.2211 | 0.2370 |
|  | RBF SVM | 0.6744 | 0.3767 | 0.3958 | 0.4417 | 0.3252 | 0.3819 |
|  | Gaussian Process | 0.7756 | 0.4536 | 0.4582 | 0.4767 | 0.4078 | 0.4539 |
|  | Decision Tree | 0.8378 | 0.6531 | 0.6560 | 0.6760 | 0.6147 | 0.6527 |
| **12** | Random Forest | 0.6944 | 0.3558 | 0.3637 | 0.3983 | 0.3082 | 0.3561 |
|  | Neural Network | 0.7344 | 0.4211 | 0.4371 | 0.4720 | 0.3750 | 0.4256 |
|  | AdaBoost | 0.8067 | 0.4895 | 0.5018 | 0.5278 | 0.4608 | 0.4931 |
|  | Naive Bayes | 0.7033 | 0.4528 | 0.4482 | 0.4768 | 0.3793 | 0.4478 |
|  | Nearest Neighbors | 0.6044 | 0.3683 | 0.3557 | 0.3887 | 0.2828 | 0.3538 |
|  | Linear SVM | 0.5822 | 0.2211 | 0.2675 | 0.3583 | 0.2211 | 0.2370 |
|  | RBF SVM | 0.6544 | 0.3714 | 0.3813 | 0.4290 | 0.3056 | 0.3711 |
|  | Gaussian Process | 0.7356 | 0.4086 | 0.4160 | 0.4417 | 0.3538 | 0.4096 |
|  | Decision Tree | 0.8178 | 0.6033 | 0.6032 | 0.6176 | 0.5672 | 0.6020 |
| **15** | Random Forest | 0.6222 | 0.3473 | 0.3082 | 0.3463 | 0.2514 | 0.3163 |
|  | Neural Network | 0.7144 | 0.3953 | 0.4198 | 0.4632 | 0.3576 | 0.4035 |
|  | AdaBoost | 0.8067 | 0.4895 | 0.5018 | 0.5278 | 0.4608 | 0.4931 |
|  | Naive Bayes | 0.6622 | 0.4446 | 0.4299 | 0.4532 | 0.3569 | 0.4347 |
|  | Nearest Neighbors | 0.6122 | 0.3459 | 0.3344 | 0.3662 | 0.2583 | 0.3349 |
|  | Linear SVM | 0.5822 | 0.2211 | 0.2675 | 0.3583 | 0.2211 | 0.2370 |
|  | RBF SVM | 0.6533 | 0.3753 | 0.3743 | 0.4267 | 0.3067 | 0.3669 |
|  | Gaussian Process | 0.7044 | 0.3762 | 0.3825 | 0.4141 | 0.3238 | 0.3761 |
|  | Decision Tree | 0.8278 | 0.6333 | 0.6372 | 0.6576 | 0.5972 | 0.6334 |
| **18** | Random Forest | 0.6744 | 0.4328 | 0.4386 | 0.4833 | 0.3824 | 0.4290 |
|  | Neural Network | 0.7244 | 0.4332 | 0.4559 | 0.4998 | 0.3941 | 0.4405 |
|  | AdaBoost | 0.7667 | 0.4562 | 0.4721 | 0.5061 | 0.4341 | 0.4614 |
|  | Naive Bayes | 0.6622 | 0.4455 | 0.4326 | 0.4577 | 0.3590 | 0.4366 |
|  | Nearest Neighbors | 0.5722 | 0.2951 | 0.3002 | 0.3426 | 0.2282 | 0.2936 |
|  | Linear SVM | 0.5822 | 0.2211 | 0.2675 | 0.3583 | 0.2211 | 0.2370 |
|  | RBF SVM | 0.6344 | 0.3721 | 0.3606 | 0.4169 | 0.2954 | 0.3540 |
|  | Gaussian Process | 0.7044 | 0.3914 | 0.4021 | 0.4415 | 0.3355 | 0.3928 |
|  | Decision Tree | 0.7978 | 0.6118 | 0.6177 | 0.6495 | 0.5545 | 0.6119 |
| **21** | Random Forest | 0.7022 | 0.4212 | 0.4149 | 0.4490 | 0.3444 | 0.4132 |
|  | Neural Network | 0.6844 | 0.3993 | 0.4172 | 0.4621 | 0.3498 | 0.4040 |
|  | AdaBoost | 0.7667 | 0.4645 | 0.4805 | 0.5144 | 0.4424 | 0.4697 |
|  | Naive Bayes | 0.6111 | 0.4369 | 0.4202 | 0.4536 | 0.3377 | 0.4243 |

Table A3: TOPSIS ranking of classification methods for course “teaching and reflection” with different feature numbers

| Features | Nearest Neighbors | Linear SVM | RBF SVM | Gaussian Process | Decision Tree | Random Forest | Neural Net | AdaBoost | Naive Bayes |
| --- | --- | --- | --- | --- | --- | --- | --- | --- | --- |
| **12** | 0.1900 | 0.0000 | 0.3206 | 0.5001 | **1.0000** | 0.2625 | 0.4326 | 0.6111 | 0.4667 |
| **15** | 0.2755 | 0.0138 | 0.3321 | 0.4440 | **1.0000** | 0.1946 | 0.4414 | 0.7015 | 0.4839 |
| **18** | 0.2021 | 0.0000 | 0.2990 | 0.3222 | **1.0000** | 0.4638 | 0.4978 | 0.5629 | 0.4480 |
| **21** | 0.1190 | 0.0188 | 0.2953 | 0.3937 | **1.0000** | 0.4382 | 0.4266 | 0.6273 | 0.4430 |
